# Supplementary material
Source: PubMed Central journal article supplement (PMC9718008)
Supplement: CJN.03790322-s0001.pdf [file CJN.03790322-s0001.pdf]

## Table of Contents

|                                             |    |
|---------------------------------------------|----|
| <b>ASSUMPTIONS</b> .....                    | 2  |
| <b>MORTALITY AND EVENT INCIDENCE</b> .....  | 4  |
| <b>HEALTH-RELATED QUALITY OF LIFE</b> ..... | 6  |
| <b>MODEL VALIDATION</b> .....               | 7  |
| <b>REFERENCES</b> .....                     | 9  |
| <b>SUPPLEMENTAL TABLES</b> .....            | 10 |
| <b>SUPPLEMENTAL FIGURES</b> .....           | 19 |

## List of Tables

|                                                                                                                               |    |
|-------------------------------------------------------------------------------------------------------------------------------|----|
| Supplemental Table 1. Patient profile.....                                                                                    | 10 |
| Supplemental Table 2. CKD transition matrix - dapagliflozin and standard therapy.....                                         | 11 |
| Supplemental Table 3. CKD transition matrix - placebo and standard therapy.....                                               | 12 |
| <i>Supplemental Table 4. Parameterisations of adjusted all-cause mortality parametric (Gompertz) survival equations</i> ..... | 13 |
| Supplemental Table 5. Adjusted generalised estimating equations predicting hospitalisation for heart failure events.....      | 13 |
| Supplemental Table 6. Adjusted generalised estimating equations predicting acute decline in kidney function events.....       | 14 |
| Supplemental Table 7. Annual probability of clinical and adverse events.....                                                  | 14 |
| Supplemental Table 8. Base-case discounted health economic results (native currency).....                                     | 15 |
| <i>Supplemental Table 9. The effect of alternative treatment discontinuation assumptions</i> .....                            | 16 |
| <i>Supplemental Table 10. Deterministic sensitivity analysis</i> .....                                                        | 17 |

## List of Figures

|                                                                                                                                                                                                                                                       |    |
|-------------------------------------------------------------------------------------------------------------------------------------------------------------------------------------------------------------------------------------------------------|----|
| <i>Supplemental Figure 1. Stacked area plot of predicted (dashed line) and observed (solid line) patient distribution in CKD stages in the model and DAPA-CKD trial, respectively.</i> .....                                                          | 19 |
| <i>Supplemental Figure 2. Observed (solid line) and predicted (dotted line) incidence of all-cause mortality.</i> .....                                                                                                                               | 20 |
| <i>Supplemental Figure 3. Extrapolated mortality rate of patients treated with dapagliflozin and standard therapy versus placebo and standard therapy over a lifetime horizon using a Gompertz survival equation</i> .....                            | 21 |
| <i>Supplemental Figure 4. Observed (rhombuses) and predicted (circles) incidence of acute decline in kidney function and hospitalisation for heart failure across subgroups.</i> .....                                                                | 22 |
| <i>Supplemental Figure 5. Cumulative accrual of QALYs and total costs (left to right) in patients treated with dapagliflozin and standard therapy (blue) and standard therapy only (grey) in UK, Germany and Spain setting (top to bottom).</i> ..... | 23 |

## ASSUMPTIONS

The below list details a summary of assumptions that have been made in the presented analysis:

- Transition probabilities between health states defined by CKD stages were derived using monthly transition count data assuming last observation carried forward (i.e. patients were assumed to remain in a CKD stage until an observation indicating that they had moved).
- Patients were assumed to discontinue dapagliflozin at an annual rate of 6.2% per annum in this analysis.
- Acute decline in kidney function events were assumed to incur costs associated with a single outpatient visit to reflect the likelihood of increased monitoring following a rapid decline in kidney function; no additional costs were considered to minimize the risk of double-counting with increased management costs associated with more advanced CKD stage.
- The cost of an incidence of volume depletion at £33.00 is assumed to be one GP visit.
- The cost of additional monitoring visits was applied to dapagliflozin arm only; one visit assumed at baseline and after 12 months if patients remain on treatment.
- Patients treated with dapagliflozin were assumed to require additional monitoring following initiation of therapy, incurring costs associated with an outpatient visit at model initiation and at one year if they remained on treatment.
- EQ-5D-5L responses were mapped to EQ-5D-3L applying the mapping function developed by van Hout et al.,<sup>1</sup> in line with NICE technology assessment guidelines and assuming that reported domain scores within individual questionnaires were uncorrelated.

- Patients were assumed to discontinue treatment with dapagliflozin upon receipt of a kidney transplant but were assumed to remain on treatment upon initiation dialysis with associated relative costs and treatment effects.
- Acute decline in kidney function events were assumed to result in no additional utility decrement as loss in quality of life associated with more advanced CKD is independently captured through health state utility values.

## MORTALITY AND EVENT INCIDENCE

Parametric survival equations fitted to DAPA-CKD individual patient data are used to estimate the incidence of all-cause mortality. Adjusted and unadjusted parametric survival equations have been included for the overall DAPA-CKD trial population in addition to key subgroups of interest. The parameterisations for the adjusted mortality equations are shown in Supplemental Table 4. CKD stages G3a and G3b (eGFR 30-60 mL/min/1.73m<sup>2</sup>) were pooled for analysis to increase statistical power, as there was little differentiation observed in outcomes between patients with eGFR 30-60 mL/min/1.73m<sup>2</sup> in the DAPA-CKD trial. A formal expert elicitation has been conducted previously to inform and validate the long-term extrapolations of mortality.<sup>2</sup>

To ensure that the mortality predictions accounted for the long-term increase associated with ageing, derived risk equations were supplemented with country-specific life tables, such that the probability of death in the general population was applied if it exceeded the predicted probability of death. However, due to the increased mortality risk in patients with CKD, the age-specific mortality rates were rarely applied. Patients with eGFR >60 mL/min/1.73m<sup>2</sup> (CKD stage G1 and G2) were subject to age-specific mortality risk after 15 years, whilst those in the transplant health state after 19 years. Patients in all other health states were subject to the risk of mortality derived from the risk equation throughout the modelled time horizon.

Candidate variables for the parametric survival model were selected to align with those influencing subgroups in the DAPA-CKD trial pre-defined subgroups. These included age, sex, race, type 2 diabetes status, eGFR, UACR, systolic blood pressure, history of heart failure, history of myocardial infarction, history of stroke, smoking status, BMI, haemoglobin, serum potassium, aetiology of CKD and geographic location. The initial a pool

of candidates was subjected to a forward variable selection process conditioned on inclusion of treatment arm and time-updated eGFR respectively to capture the impact of dapagliflozin versus placebo and the expected effect on mortality of increasing eGFR category (that is, worsening CKD stage) on mortality. Each candidate variable is added in turn and only the variable leading to the greatest decrease in Akaike information criterion (AIC) is retained. The process is repeated until no further decrease in AIC is achieved. In the model base case, mortality is taken to follow a Gompertz distribution.

Unlike mortality, patients may experience multiple hospitalizations for HF or acute decline in kidney function events, as such survival analysis is inappropriate. Therefore, the incidence of hospitalization for HF and acute decline in kidney function events were estimated using generalised estimating equations (GEEs) to account for dependence between outcomes.

Similarly to the approach for survival analysis, models were adjusted for covariables that improve model fit with the target metric minimisation of the quasi-likelihood under the independence model information criterion (QIC), and the addition of a time variable to account for any potential trends in the observed data (Supplemental Figure 4). Validation included: visual inspection, relative measures of fit (QIC), k-fold cross validation, clinical expert opinion on the plausibility of included covariables, their effect, and extrapolation.

## HEALTH-RELATED QUALITY OF LIFE

EQ-5D-5L responses were first mapped to EQ-5D-3L, applying the mapping function developed by van Hout et al.<sup>1</sup> in line with NICE guidelines.<sup>3</sup> Responses were then converted to utility index scores using published country specific utility tariffs for the UK, Germany and Spain, respectively, for EQ-5D health states, derived using the time trade-off method described in Dolan et al.<sup>4-6</sup>

Using these data, linear mixed-effects models, consisting of fixed and random components, were derived to predict patient-reported utility values to account for the clustering of multiple questionnaires per patient. Regression models were adjusted for important patient demographic characteristics, such as age, sex, type 2 diabetes status and UACR > 1,000 mg/g, and the incidence of adverse clinical outcomes disease severity jointly. The fixed effects coefficients were used for modelling; utilities used in the model (marginal means for health states and event utility decrements) are provided in Table 2.

## MODEL VALIDATION

Validation and verification has been conducted to ensure correct implementation, and that the model reliably reproduces outcomes observed in the DAPA-CKD clinical trial. The following exercises have been undertaken to ensure that the model is robust:

- Model equations and parameters have been validated against their source to ensure that there were no transcription errors.
- Input derivation has been reviewed to ensure that there were no issues with their implementation.

In addition, the outcomes observed in the trial have been compared against modelled predictions. Supplemental Figure 2 provides a validation of predicted mortality under different distributions to Kaplan Meier data from the DAPA-CKD clinical trial. All distributions validate well to the trial, however Gompertz was the distribution with the best fit to the data. To ensure that long term extrapolations of survival are estimated by the model, Supplemental Figure 3 provides the predicted survival for patients on dapagliflozin and placebo.

Validation to acute decline in kidney function and hospitalisation for heart failure events in the trial was conducted for each considered subgroup. Supplemental Figure 4 demonstrates that the model performed well when predicting outcomes observed in the trial.

Fluctuations in eGFR measurements are common, and when taken in isolation, corresponding CKD stages could be misrepresented. To ensure that the model is not sensitive to CKD transitions, cost and utilities associated with CKD stage G3a (45-59ml/min/1.73m<sup>2</sup>) were assumed for all CKD stages prior to kidney failure. In addition, eGFR was assumed to have an equivalent impact in risk equations prior to kidney failure. These alterations did not

materially affect the study conclusions, with ICERs of \$7,997, \$18,111 and \$11,025 in the UK, Germany and Spain, respectively.

Additionally, the time spent in each CKD stage compared with progression in the trial is presented in Supplemental Figure 1, further demonstrating the reliability of the monthly transitions.



## REFERENCES

1. van Hout B, Janssen MF, Feng Y-S, Kohlmann T, Busschbach J, Golicki D, Lloyd A, Scalone L, Kind P, Pickard AS: Interim Scoring for the EQ-5D-5L: Mapping the EQ-5D-5L to EQ-5D-3L Value Sets. *Value in Health*, 15: 708-715, 2012 10.1016/j.jval.2012.02.008
2. Willigers B, Ouwens M, Briggs A, Darlington O, Bhatt P, Wittbrodt E, Sinsakul M, Lambers Heerspink H, Pollock C, Silva Pecoits Filho RF, Tangri N, Kovesdy C, Wheeler D, Garcia Sanchez JJ: MO516A STRUCTURED EXPERT ELICITATION TO INFORM AND VALIDATE MORTALITY EXTRAPOLATIONS FOR A COST-EFFECTIVENESS ANALYSIS OF DAPAGLIFLOZIN. *Nephrology Dialysis Transplantation*, 36, 2021 10.1093/ndt/gfab087.0036
3. Longworth L, Rowen D: Mapping to Obtain EQ-5D Utility Values for Use in NICE Health Technology Assessments. *Value in Health*, 16: 202-210, 2013 <https://doi.org/10.1016/j.jval.2012.10.010>
4. Dolan P: Modeling Valuations for EuroQol Health States. *Medical Care*, 35: 1095-1108, 1997
5. Ludwig K, von der Schulenburg J-MG, Greiner W: German value set for the EQ-5D-5L. *Pharmacoeconomics*, 36: 663-674, 2018
6. Ramos-Goñi JM, Craig BM, Oppe M, Ramallo-Fariña Y, Pinto-Prades JL, Luo N, Rivero-Arias O: Handling data quality issues to estimate the Spanish EQ-5D-5L value set using a hybrid interval regression approach. *Value in Health*, 21: 596-604, 2018
7. Heerspink HJL, Stefánsson BV, Correa-Rotter R, Chertow GM, Greene T, Hou F-F, Mann JFE, McMurray JJV, Lindberg M, Rossing P, Sjöström CD, Toto RD, Langkilde A-M, Wheeler DC: Dapagliflozin in Patients with Chronic Kidney Disease. *New England Journal of Medicine*, 383: 1436-1446, 2020 10.1056/NEJMoa2024816
8. Sugrue DM, Ward T, Rai S, McEwan P, van Haalen HGM: Economic Modelling of Chronic Kidney Disease: A Systematic Literature Review to Inform Conceptual Model Design. *Pharmacoeconomics*, 37: 1451-1468, 2019 10.1007/s40273-019-00835-z

## SUPPLEMENTAL TABLES

*Supplemental Table 1. Patient profile*

| Variable                                                                                                                                                                                                                                                                                             | Mean (SE)                                | Distribution*        |
|------------------------------------------------------------------------------------------------------------------------------------------------------------------------------------------------------------------------------------------------------------------------------------------------------|------------------------------------------|----------------------|
| <b>Patient characteristics</b>                                                                                                                                                                                                                                                                       | Age (years)                              | 61.84 (0.18) Normal  |
|                                                                                                                                                                                                                                                                                                      | Female                                   | 0.33 (0.01) Beta     |
|                                                                                                                                                                                                                                                                                                      | BMI (kg/m <sup>2</sup> )                 | 29.52 (0.09) Normal  |
|                                                                                                                                                                                                                                                                                                      | Race: White                              | 0.53 (0.01) Beta     |
|                                                                                                                                                                                                                                                                                                      | Race: Black or African American          | 0.04 (0.00) Beta     |
|                                                                                                                                                                                                                                                                                                      | Race: Other                              | 0.08 (0.00) Beta     |
|                                                                                                                                                                                                                                                                                                      | Smoker                                   | 0.14 (0.01) Beta     |
| <b>Clinical characteristics</b>                                                                                                                                                                                                                                                                      | CKD G1 (eGFR ≥90)                        | 0.00 (0.00) Beta     |
|                                                                                                                                                                                                                                                                                                      | CKD G2 (eGFR 60-89)                      | 0.11 (0.00) Beta     |
|                                                                                                                                                                                                                                                                                                      | CKD G3a (eGFR 45-59)                     | 0.31 (0.01) Beta     |
|                                                                                                                                                                                                                                                                                                      | CKD G3b (eGFR 30-44)                     | 0.44 (0.01) Beta     |
|                                                                                                                                                                                                                                                                                                      | CKD G4 (eGFR 15-29)                      | 0.14 (0.01) Beta     |
|                                                                                                                                                                                                                                                                                                      | CKD G5 (pre-KRT; eGFR <15)               | 0.00 (0.00) Beta     |
|                                                                                                                                                                                                                                                                                                      | Dialysis                                 | 0.00 (0.00) Beta     |
|                                                                                                                                                                                                                                                                                                      | Transplant                               | 0.00 (0.00) Beta     |
|                                                                                                                                                                                                                                                                                                      | UACR: 30-300 mg/g                        | 0.10 (0.00) Beta     |
|                                                                                                                                                                                                                                                                                                      | UACR: ≥300 mg/g                          | 0.90 (0.00) Beta     |
|                                                                                                                                                                                                                                                                                                      | Type 2 diabetes                          | 0.68 (0.01) Beta     |
|                                                                                                                                                                                                                                                                                                      | Glomerulonephritis                       | 0.16 (0.01) Beta     |
|                                                                                                                                                                                                                                                                                                      | Angiotensin-converting enzyme inhibitors | 0.27 (0.01) Beta     |
|                                                                                                                                                                                                                                                                                                      | Angiotensin receptor blockers            | 0.56 (0.01) Beta     |
|                                                                                                                                                                                                                                                                                                      | Mineralocorticoid receptor antagonists   | 0.05 (0.00) Beta     |
|                                                                                                                                                                                                                                                                                                      | Diuretic                                 | 0.37 (0.01) Beta     |
|                                                                                                                                                                                                                                                                                                      | Potassium                                | 4.65 (0.01) Normal   |
|                                                                                                                                                                                                                                                                                                      | Systolic blood pressure                  | 137.08 (0.27) Normal |
| Haemoglobin                                                                                                                                                                                                                                                                                          | 12.83 (0.03) Normal                      |                      |
| <b>Patient history</b>                                                                                                                                                                                                                                                                               | Prior heart failure                      | 0.11 (0.00) Beta     |
|                                                                                                                                                                                                                                                                                                      | Prior myocardial infarction              | 0.09 (0.00) Beta     |
|                                                                                                                                                                                                                                                                                                      | Prior stroke                             | 0.07 (0.00) Beta     |
| <i>BMI: body mass index; CKD: chronic kidney disease; eGFR: estimated glomerular filtration rate; KRT: kidney replacement therapy; SE: standard error; UACR: urine albumin-to-creatinine ratio</i><br><i>*Distributions define the values that are sampled in probabilistic sensitivity analysis</i> |                                          |                      |

Supplemental Table 2. CKD transition matrix - dapagliflozin and standard therapy

|                                                                                                                                                                                                                                                                                                                                                     | CKD G1        | CKD G2        | CKD G3a       | CKD G3b       | CKD G4        | CKD G5        | Dialysis       | Kidney transplant | Reference                   |
|-----------------------------------------------------------------------------------------------------------------------------------------------------------------------------------------------------------------------------------------------------------------------------------------------------------------------------------------------------|---------------|---------------|---------------|---------------|---------------|---------------|----------------|-------------------|-----------------------------|
| <b>Months 0-4</b>                                                                                                                                                                                                                                                                                                                                   |               |               |               |               |               |               |                |                   |                             |
| CKD G1                                                                                                                                                                                                                                                                                                                                              | 0.586 (0.076) | 0.219 (0.064) | 0.049 (0.033) | 0.049 (0.033) | 0.024 (0.024) | 0.024 (0.024) | 0.024 (0.024)  | 0.025 (0.024)     | DAPA-CKD trial <sup>7</sup> |
| CKD G2                                                                                                                                                                                                                                                                                                                                              | 0.018 (0.005) | 0.709 (0.016) | 0.246 (0.015) | 0.019 (0.005) | 0.003 (0.002) | 0.003 (0.002) | 0.001 (0.001)  | 0.001 (0.001)     |                             |
| CKD G3a                                                                                                                                                                                                                                                                                                                                             | 0.001 (0.001) | 0.079 (0.006) | 0.749 (0.009) | 0.162 (0.008) | 0.008 (0.002) | 0.000 (0.000) | 0.000 (0.000)  | 0.000 (0.000)     |                             |
| CKD G3b                                                                                                                                                                                                                                                                                                                                             | 0.001 (0.000) | 0.005 (0.001) | 0.079 (0.004) | 0.812 (0.006) | 0.102 (0.005) | 0.001 (0.000) | 0.000 (0.000)  | 0.000 (0.000)     |                             |
| CKD G4                                                                                                                                                                                                                                                                                                                                              | 0.001 (0.001) | 0.003 (0.001) | 0.006 (0.002) | 0.143 (0.008) | 0.843 (0.008) | 0.004 (0.001) | 0.001 (0.001)  | 0.001 (0.000)     |                             |
| CKD G5                                                                                                                                                                                                                                                                                                                                              | 0.063 (0.060) | 0.125 (0.080) | 0.062 (0.058) | 0.124 (0.080) | 0.375 (0.118) | 0.125 (0.080) | 0.063 (0.059)  | 0.062 (0.059)     |                             |
| Dialysis                                                                                                                                                                                                                                                                                                                                            | 0.000 (0.000) | 0.000 (0.000) | 0.000 (0.000) | 0.000 (0.000) | 0.000 (0.000) | 0.000 (0.000) | 0.995 (0.0995) | 0.005 (0.0005)    | Sugrue et al. <sup>8*</sup> |
| Kidney transplant                                                                                                                                                                                                                                                                                                                                   | 0.000 (0.000) | 0.000 (0.000) | 0.000 (0.000) | 0.000 (0.000) | 0.000 (0.000) | 0.000 (0.000) | 0.007 (0.0007) | 0.993 (0.0993)    |                             |
| <b>Months 4+</b>                                                                                                                                                                                                                                                                                                                                    |               |               |               |               |               |               |                |                   |                             |
| CKD G1                                                                                                                                                                                                                                                                                                                                              | 0.891 (0.017) | 0.070 (0.014) | 0.009 (0.005) | 0.015 (0.007) | 0.006 (0.004) | 0.003 (0.003) | 0.003 (0.003)  | 0.003 (0.003)     | DAPA-CKD trial <sup>7</sup> |
| CKD G2                                                                                                                                                                                                                                                                                                                                              | 0.005 (0.001) | 0.909 (0.004) | 0.078 (0.004) | 0.006 (0.001) | 0.002 (0.001) | 0.000 (0.000) | 0.000 (0.000)  | 0.000 (0.000)     |                             |
| CKD G3a                                                                                                                                                                                                                                                                                                                                             | 0.001 (0.000) | 0.025 (0.001) | 0.913 (0.003) | 0.059 (0.002) | 0.002 (0.000) | 0.000 (0.000) | 0.000 (0.000)  | 0.000 (0.000)     |                             |
| CKD G3b                                                                                                                                                                                                                                                                                                                                             | 0.000 (0.000) | 0.001 (0.000) | 0.025 (0.001) | 0.938 (0.002) | 0.035 (0.001) | 0.000 (0.000) | 0.000 (0.000)  | 0.000 (0.000)     |                             |
| CKD G4                                                                                                                                                                                                                                                                                                                                              | 0.000 (0.000) | 0.000 (0.000) | 0.001 (0.000) | 0.035 (0.002) | 0.952 (0.002) | 0.010 (0.001) | 0.001 (0.000)  | 0.000 (0.000)     |                             |
| CKD G5                                                                                                                                                                                                                                                                                                                                              | 0.001 (0.001) | 0.002 (0.001) | 0.002 (0.001) | 0.001 (0.001) | 0.027 (0.005) | 0.920 (0.008) | 0.045 (0.006)  | 0.002 (0.001)     |                             |
| Dialysis                                                                                                                                                                                                                                                                                                                                            | 0.000 (0.000) | 0.000 (0.000) | 0.000 (0.000) | 0.000 (0.000) | 0.000 (0.000) | 0.000 (0.000) | 0.995 (0.0995) | 0.005 (0.0005)    | Sugrue et al. <sup>8*</sup> |
| Kidney transplant                                                                                                                                                                                                                                                                                                                                   | 0.000 (0.000) | 0.000 (0.000) | 0.000 (0.000) | 0.000 (0.000) | 0.000 (0.000) | 0.000 (0.000) | 0.007 (0.0007) | 0.993 (0.0993)    |                             |
| <p>CKD: chronic kidney disease; SE: standard error</p> <p>* Mean values from transition probabilities identified in the Sugrue et al.</p> <p>All values are expressed a mean (SE), with mean values representing monthly transition probabilities. Standard errors represent the variability applied in the probabilistic sensitivity analysis.</p> |               |               |               |               |               |               |                |                   |                             |

Supplemental Table 3. CKD transition matrix - placebo and standard therapy

|                   | CKD G1        | CKD G2        | CKD G3a       | CKD G3b       | CKD G4        | CKD G5        | Dialysis       | Kidney transplant | Reference                   |
|-------------------|---------------|---------------|---------------|---------------|---------------|---------------|----------------|-------------------|-----------------------------|
| <b>Months 0-4</b> |               |               |               |               |               |               |                |                   |                             |
| CKD G1            | 0.375 (0.084) | 0.313 (0.081) | 0.156 (0.064) | 0.031 (0.030) | 0.031 (0.030) | 0.031 (0.030) | 0.031 (0.030)  | 0.031 (0.030)     | DAPA-CKD trial <sup>7</sup> |
| CKD G2            | 0.009 (0.003) | 0.770 (0.014) | 0.195 (0.013) | 0.016 (0.004) | 0.004 (0.002) | 0.002 (0.002) | 0.002 (0.002)  | 0.001 (0.001)     |                             |
| CKD G3a           | 0.002 (0.001) | 0.070 (0.005) | 0.774 (0.009) | 0.149 (0.007) | 0.004 (0.001) | 0.000 (0.000) | 0.000 (0.000)  | 0.000 (0.000)     |                             |
| CKD G3b           | 0.002 (0.001) | 0.004 (0.001) | 0.084 (0.005) | 0.826 (0.006) | 0.082 (0.005) | 0.001 (0.001) | 0.001 (0.000)  | 0.000 (0.000)     |                             |
| CKD G4            | 0.001 (0.001) | 0.002 (0.001) | 0.005 (0.002) | 0.127 (0.008) | 0.856 (0.009) | 0.007 (0.002) | 0.001 (0.001)  | 0.001 (0.001)     |                             |
| CKD G5            | 0.043 (0.041) | 0.174 (0.077) | 0.043 (0.042) | 0.044 (0.042) | 0.175 (0.077) | 0.348 (0.097) | 0.130 (0.068)  | 0.043 (0.041)     |                             |
| Dialysis          | 0.000 (0.000) | 0.000 (0.000) | 0.000 (0.000) | 0.000 (0.000) | 0.000 (0.000) | 0.000 (0.000) | 0.995 (0.0995) | 0.005 (0.0005)    | Sugrue et al. <sup>8*</sup> |
| Kidney transplant | 0.000 (0.000) | 0.000 (0.000) | 0.000 (0.000) | 0.000 (0.000) | 0.000 (0.000) | 0.000 (0.000) | 0.007 (0.0007) | 0.993 (0.0993)    |                             |
| <b>Months 4+</b>  |               |               |               |               |               |               |                |                   |                             |
| CKD G1            | 0.884 (0.020) | 0.075 (0.016) | 0.015 (0.007) | 0.011 (0.006) | 0.004 (0.004) | 0.004 (0.004) | 0.004 (0.004)  | 0.004 (0.004)     | DAPA-CKD trial <sup>7</sup> |
| CKD G2            | 0.004 (0.001) | 0.915 (0.004) | 0.072 (0.004) | 0.008 (0.001) | 0.002 (0.001) | 0.000 (0.000) | 0.000 (0.000)  | 0.000 (0.000)     |                             |
| CKD G3a           | 0.000 (0.000) | 0.023 (0.001) | 0.910 (0.003) | 0.064 (0.002) | 0.003 (0.001) | 0.000 (0.000) | 0.000 (0.000)  | 0.000 (0.000)     |                             |
| CKD G3b           | 0.000 (0.000) | 0.001 (0.000) | 0.026 (0.001) | 0.931 (0.002) | 0.041 (0.001) | 0.000 (0.000) | 0.001 (0.000)  | 0.000 (0.000)     |                             |
| CKD G4            | 0.000 (0.000) | 0.001 (0.000) | 0.001 (0.000) | 0.028 (0.001) | 0.954 (0.002) | 0.014 (0.001) | 0.002 (0.000)  | 0.000 (0.000)     |                             |
| CKD G5            | 0.001 (0.001) | 0.001 (0.001) | 0.001 (0.001) | 0.002 (0.001) | 0.038 (0.005) | 0.910 (0.008) | 0.044 (0.005)  | 0.003 (0.002)     |                             |
| Dialysis          | 0.000 (0.000) | 0.000 (0.000) | 0.000 (0.000) | 0.000 (0.000) | 0.000 (0.000) | 0.000 (0.000) | 0.995 (0.0995) | 0.005 (0.0005)    | Sugrue et al. <sup>8*</sup> |
| Kidney transplant | 0.000 (0.000) | 0.000 (0.000) | 0.000 (0.000) | 0.000 (0.000) | 0.000 (0.000) | 0.000 (0.000) | 0.007 (0.0007) | 0.993 (0.0993)    |                             |

CKD: chronic kidney disease; SE: standard error  
\* Mean values from transition probabilities identified in Sugrue et al.  
All values are expressed a mean (SE) , with mean values representing monthly transition probabilities. Standard errors represent the variability applied in the probabilistic sensitivity analysis.

Supplemental Table 4. Parameterisations of adjusted all-cause mortality parametric (Gompertz) survival equations

| Covariate                                                                                                                                                                                                                                                                                                                         | Coefficient (95% CI)    | p-value |
|-----------------------------------------------------------------------------------------------------------------------------------------------------------------------------------------------------------------------------------------------------------------------------------------------------------------------------------|-------------------------|---------|
| Shape                                                                                                                                                                                                                                                                                                                             | 0.00026 (-0.00; 0.00)   | 0.216   |
| Rate                                                                                                                                                                                                                                                                                                                              | 0.00069 (0.00; 0.01)    | 0.357   |
| Dapagliflozin                                                                                                                                                                                                                                                                                                                     | -0.36597 (-0.62; -0.11) | 0.005   |
| Age                                                                                                                                                                                                                                                                                                                               | 0.03436 (0.02; 0.05)    | <0.001  |
| Female                                                                                                                                                                                                                                                                                                                            | -0.36049 (-0.64; -0.08) | 0.012   |
| Race: Black or African American                                                                                                                                                                                                                                                                                                   | 0.63375 (-0.04; 1.30)   | 0.064   |
| Race: White                                                                                                                                                                                                                                                                                                                       | 0.81962 (0.43; 1.21)    | <0.001  |
| Race: Other                                                                                                                                                                                                                                                                                                                       | 0.84351 (0.36; 1.33)    | 0.001   |
| BMI                                                                                                                                                                                                                                                                                                                               | -0.02235 (-0.05; 0.00)  | 0.065   |
| eGFR <15*                                                                                                                                                                                                                                                                                                                         | 1.47894 (0.76; 2.20)    | <0.001  |
| eGFR 15-30                                                                                                                                                                                                                                                                                                                        | 0.53771 (-0.04; 1.12)   | 0.069   |
| eGFR 30-60                                                                                                                                                                                                                                                                                                                        | 0.28160 (-0.28; 0.84)   | 0.322   |
| Haemoglobin                                                                                                                                                                                                                                                                                                                       | -0.22982 (-0.31; -0.15) | <0.001  |
| Glomerulonephritis                                                                                                                                                                                                                                                                                                                | -0.45994 (-1.03; 0.11)  | 0.112   |
| Systolic blood pressure                                                                                                                                                                                                                                                                                                           | -0.00930 (-0.02; -0.00) | 0.011   |
| Potassium                                                                                                                                                                                                                                                                                                                         | -0.16838 (-0.39; 0.05)  | 0.136   |
| Prior heart failure                                                                                                                                                                                                                                                                                                               | 0.81752 (0.51; 1.13)    | <0.001  |
| Prior myocardial infarction                                                                                                                                                                                                                                                                                                       | 0.37557 (0.03; 0.72)    | 0.031   |
| Prior stroke                                                                                                                                                                                                                                                                                                                      | 0.47429 (0.08; 0.87)    | 0.018   |
| AIC                                                                                                                                                                                                                                                                                                                               |                         | 5061.78 |
| <i>AIC: Akaike information criterion; BMI: body mass index; CI: confidence interval; eGFR: estimated glomerular filtration rate</i><br><i>Confidence intervals define the distribution over which values are sampled in probabilistic sensitivity analysis</i><br><i>*Referent eGFR category &gt; 60 mL/min/1.73m<sup>2</sup></i> |                         |         |

Supplemental Table 5. Adjusted generalised estimating equations predicting hospitalisation for heart failure events

| Covariate                                                                                                                                                                                                                                                            | Coefficient (95% CI)      | p-value |
|----------------------------------------------------------------------------------------------------------------------------------------------------------------------------------------------------------------------------------------------------------------------|---------------------------|---------|
| Intercept                                                                                                                                                                                                                                                            | -11.41542 (-14.86; -7.97) | <0.001  |
| Dapagliflozin                                                                                                                                                                                                                                                        | -0.64716 (-1.07; -0.23)   | 0.002   |
| Age                                                                                                                                                                                                                                                                  | 0.04654 (0.02; 0.07)      | <0.001  |
| Type 2 diabetes mellitus                                                                                                                                                                                                                                             | 0.81195 (0.17; 1.45)      | 0.013   |
| BMI                                                                                                                                                                                                                                                                  | 0.05873 (0.02; 0.09)      | 0.001   |
| Race: Black or African American                                                                                                                                                                                                                                      | 0.41411 (-0.56; 1.39)     | 0.405   |
| Race: White                                                                                                                                                                                                                                                          | 0.65848 (0.01; 1.31)      | 0.047   |
| Race: Other                                                                                                                                                                                                                                                          | -0.35959 (-1.50; 0.78)    | 0.536   |
| Smoking                                                                                                                                                                                                                                                              | 0.48239 (0.18; 0.78)      | 0.002   |
| eGFR < 15                                                                                                                                                                                                                                                            | 0.87720 (-0.64; 2.39)     | 0.257   |
| eGFR 15-30                                                                                                                                                                                                                                                           | 0.85811 (-0.36; 2.07)     | 0.166   |
| eGFR 30-60                                                                                                                                                                                                                                                           | 0.33567 (-0.83; 1.50)     | 0.573   |
| UACR: 30-300 mg/g                                                                                                                                                                                                                                                    | 1.32207 (-0.70; 3.34)     | 0.199   |
| UACR: ≥ 300 mg/g                                                                                                                                                                                                                                                     | 1.63788 (-0.35; 3.62)     | 0.106   |
| Potassium                                                                                                                                                                                                                                                            | -0.43026 (-0.77; -0.09)   | 0.012   |
| Haemoglobin                                                                                                                                                                                                                                                          | -0.15531 (-0.30; -0.01)   | 0.032   |
| Prior heart failure                                                                                                                                                                                                                                                  | 1.75096 (1.30; 2.20)      | <0.001  |
| <i>BMI: body mass index; CI: confidence interval; eGFR: estimated glomerular filtration rate; UACR: urine albumin to creatinine ratio</i><br><i>Confidence intervals define the distribution over which values are sampled in probabilistic sensitivity analysis</i> |                           |         |

Supplemental Table 6. Adjusted generalised estimating equations predicting acute decline in kidney function events

| Covariate                       | Coefficient (95% CI)    | p-value |
|---------------------------------|-------------------------|---------|
| Intercept                       | -6.81785 (-8.97; -4.66) | <0.001  |
| Dapagliflozin                   | -0.30783 (-0.62; 0.01)  | 0.054   |
| Race: Black or African American | 0.55403 (-0.17; 1.28)   | 0.136   |
| Race: White                     | 0.54789 (0.13; 0.96)    | 0.010   |
| Race: Other                     | 0.32357 (-0.26; 0.91)   | 0.277   |
| eGFR < 15                       | 2.12615 (1.35; 2.91)    | <0.001  |
| eGFR 15-30                      | 0.61858 (-0.10; 1.34)   | 0.091   |
| eGFR 30-60                      | 0.01084 (-0.68; 0.71)   | 0.976   |
| Glomerulonephritis              | -0.59022 (-1.18; 0.00)  | 0.050   |
| Prior myocardial infarction     | 0.32089 (-0.11; 0.75)   | 0.143   |
| Potassium                       | 0.25111 (-0.03; 0.53)   | 0.081   |
| Haemoglobin                     | -0.14558 (-0.25; -0.04) | 0.006   |
| Prior heart failure             | 0.76177 (0.39; 1.13)    | <0.001  |

*BMI: body mass index; CI: confidence interval; eGFR: estimated glomerular filtration rate; UACR: urine albumin to creatinine ratio*

Supplemental Table 7. Annual probability of clinical and adverse events

| Events                            | Mean (SE)                        |                  | Reference                   |
|-----------------------------------|----------------------------------|------------------|-----------------------------|
|                                   | Dapagliflozin + standard therapy | Standard therapy |                             |
| <b>Clinical Events</b>            |                                  |                  |                             |
| Hospitalisation for heart failure | 0.008 (0.131)                    | 0.015 (0.185)    | DAPA-CKD trial <sup>7</sup> |
| Acute decline in kidney function  | 0.014 (0.172)                    | 0.020 (0.210)    |                             |
| <b>Adverse events</b>             |                                  |                  |                             |
| Volume depletion                  | 0.031 (0.004)                    | 0.021 (0.003)    | DAPA-CKD trial <sup>7</sup> |
| Major hypoglycaemic events        | 0.003 (0.001)                    | 0.006 (0.002)    |                             |
| Fractures                         | 0.020 (0.003)                    | 0.016 (0.003)    |                             |
| Diabetic ketoacidosis             | 0.000 (0.000)                    | 0.000 (0.000)    |                             |
| Amputation                        | 0.009 (0.002)                    | 0.010 (0.002)    |                             |

*SE: standard error*

Supplemental Table 8. Base-case discounted health economic results (native currency)

| Outcome                                                                              | Dapagliflozin + standard therapy | Standard therapy | Incremental         |
|--------------------------------------------------------------------------------------|----------------------------------|------------------|---------------------|
| <b>United Kingdom</b>                                                                |                                  |                  |                     |
| Total costs                                                                          | £79,677                          | £74,717          | £4,960              |
| Drug acquisition                                                                     | £4,386                           | £509             | £3,878              |
| CKD management (pre-KRT)                                                             | £26,764                          | £25,387          | £1,377              |
| KRT                                                                                  | £46,061                          | £46,402          | -£341               |
| Adverse events, hospitalisation for heart failure & acute decline in kidney function | £2,465                           | £2,419           | £46                 |
| Total QALYs gained                                                                   | 8.681                            | 7.857            | 0.824               |
| <b>ICER</b>                                                                          | -                                | -                | <b>£6,020/QALY</b>  |
| <b>Germany</b>                                                                       |                                  |                  |                     |
| Total costs                                                                          | €215,119                         | €200,187         | €14,932             |
| Drug acquisition                                                                     | €6,277                           | €353             | €5,924              |
| CKD management (pre-KRT)                                                             | €108,240                         | €98,977          | €9,263              |
| KRT                                                                                  | €96,951                          | €97,505          | -€554               |
| Adverse events, hospitalisation for heart failure & acute decline in kidney function | €3,651                           | €3,352           | €299                |
| Total QALYs gained                                                                   | 10.320                           | 9.318            | 1.003               |
| <b>ICER</b>                                                                          | -                                | -                | <b>€14,891 QALY</b> |
| <b>Spain</b>                                                                         |                                  |                  |                     |
| Total costs                                                                          | €138,620                         | €129,168         | €9,452              |
| Drug acquisition                                                                     | €3,757                           | €504             | €3,254              |
| CKD management (pre-KRT)                                                             | €62,787                          | €56,885          | €5,902              |
| KRT                                                                                  | €68,859                          | €69,003          | -€144               |
| Adverse events, hospitalisation for heart failure & acute decline in kidney function | €3,217                           | €2,777           | €440                |
| Total QALYs gained                                                                   | 9.790                            | 8.833            | 0.957               |
| <b>ICER</b>                                                                          | -                                | -                | <b>€9,875/QALY</b>  |

CKD: chronic kidney disease; ICER: incremental cost-effectiveness ratio; QALY: quality-adjusted life year

Supplemental Table 9. The effect of alternative treatment discontinuation assumptions

| Scenario                                                     | Outcome               | Dapagliflozin + standard therapy | Standard therapy     | Incremental          |
|--------------------------------------------------------------|-----------------------|----------------------------------|----------------------|----------------------|
| Discontinuation of dapagliflozin at 3 years                  | <b>United Kingdom</b> |                                  |                      |                      |
|                                                              | Total costs           | \$103,707                        | \$102,774            | \$933                |
|                                                              | Total LYs gained      | 10.766                           | 10.461               | 0.305                |
|                                                              | Total QALYs gained    | 8.096                            | 7.857                | 0.239                |
|                                                              | <b>ICER</b>           | -                                | -                    | <b>\$3,904/QALY</b>  |
|                                                              | <b>Germany</b>        |                                  |                      |                      |
|                                                              | Total costs           | \$239,867                        | \$236,908            | \$2,959              |
|                                                              | Total LYs gained      | 11.150                           | 10.833               | 0.317                |
|                                                              | Total QALYs gained    | 9.602                            | 9.318                | 0.284                |
|                                                              | <b>ICER</b>           | -                                | -                    | <b>\$10,417/QALY</b> |
|                                                              | <b>Spain</b>          |                                  |                      |                      |
|                                                              | Total costs           | \$154,533                        | \$152,862            | \$1,671              |
|                                                              | Total LYs gained      | 11.166                           | 10.846               | 0.320                |
| Total QALYs gained                                           | 9.105                 | 8.833                            | 0.272                |                      |
| <b>ICER</b>                                                  | -                     | -                                | <b>\$6,148/QALY</b>  |                      |
| Tapering of dapagliflozin discontinuation to 0% over 4 years | <b>United Kingdom</b> |                                  |                      |                      |
|                                                              | Total costs           | \$114,963                        | \$102,774            | \$12,188             |
|                                                              | Total LYs gained      | 12.038                           | 10.461               | 1.577                |
|                                                              | Total QALYs gained    | 9.067                            | 7.857                | 1.210                |
|                                                              | <b>ICER</b>           | -                                | -                    | <b>\$10,072/QALY</b> |
|                                                              | <b>Germany</b>        |                                  |                      |                      |
|                                                              | Total costs           | \$266,817                        | \$236,908            | \$29,910             |
|                                                              | Total LYs gained      | 12.518                           | 10.833               | 1.685                |
|                                                              | Total QALYs gained    | 10.801                           | 9.318                | 1.483                |
|                                                              | <b>ICER</b>           | -                                | -                    | <b>\$20,166/QALY</b> |
|                                                              | <b>Spain</b>          |                                  |                      |                      |
|                                                              | Total costs           | \$172,288                        | \$152,862            | \$19,426             |
|                                                              | Total LYs gained      | 12.550                           | 10.846               | 1.704                |
| Total QALYs gained                                           | 10.253                | 8.833                            | 1.420                |                      |
| <b>ICER</b>                                                  | -                     | -                                | <b>\$13,676/QALY</b> |                      |

ICER: incremental cost-effectiveness ratio; LY: life year; QALY: quality-adjusted life year; ST: standard therapy



Supplemental Table 10. Deterministic sensitivity analysis

| Scenario                           | UK       |       |       |               | Germany  |       |       |               | Spain    |       |       |               |
|------------------------------------|----------|-------|-------|---------------|----------|-------|-------|---------------|----------|-------|-------|---------------|
|                                    | Cost     | QALYs | LYs   | Cost/<br>QALY | Cost     | QALYs | LYs   | Cost/<br>QALY | Cost     | QALYs | LYs   | Cost/<br>QALY |
| <b>Base case</b>                   | \$6,823  | 0.824 | 1.068 | \$8,281       | \$17,671 | 1.003 | 1.134 | \$17,623      | \$11,186 | 0.957 | 1.143 | \$11,686      |
| Model time horizon (10 years)      | \$3,992  | 0.67  | 0.862 | \$5,957       | \$11,416 | 0.807 | 0.904 | \$14,151      | \$6,896  | 0.768 | 0.909 | \$8,974       |
| Model time horizon (Lifetime)      | \$6,823  | 0.824 | 1.068 | \$8,281       | \$17,671 | 1.003 | 1.134 | \$17,623      | \$11,186 | 0.957 | 1.143 | \$11,686      |
| Cost discounting (0.00%)           | \$13,224 | 0.824 | 1.068 | \$16,050      | \$30,219 | 1.003 | 1.134 | \$30,137      | \$19,476 | 0.957 | 1.143 | \$20,348      |
| Cost discounting (6.00%)           | \$4,459  | 0.824 | 1.068 | \$5,411       | \$10,852 | 1.003 | 1.134 | \$10,822      | \$6,751  | 0.957 | 1.143 | \$7,053       |
| Benefit discounting (0.00%)        | \$6,823  | 1.339 | 1.749 | \$5,094       | \$17,671 | 1.527 | 1.736 | \$11,575      | \$11,186 | 1.459 | 1.752 | \$7,667       |
| Benefit discounting (6.00%)        | \$6,823  | 0.608 | 0.784 | \$11,228      | \$17,671 | 0.693 | 0.779 | \$25,507      | \$11,186 | 0.661 | 0.785 | \$16,920      |
| Adverse events (excluded)          | \$6,626  | 0.825 | 1.068 | \$8,034       | \$17,197 | 1.003 | 1.134 | \$17,137      | \$10,592 | 0.958 | 1.143 | \$11,057      |
| Adverse events (included)          | \$6,823  | 0.824 | 1.068 | \$8,281       | \$17,671 | 1.003 | 1.134 | \$17,623      | \$11,186 | 0.957 | 1.143 | \$11,686      |
| Sub population: T2DM               | \$6,882  | 0.815 | 1.058 | \$8,444       | \$17,606 | 0.985 | 1.115 | \$17,869      | \$11,195 | 0.944 | 1.128 | \$11,859      |
| Sub population: No T2DM            | \$6,646  | 0.842 | 1.09  | \$7,897       | \$17,731 | 1.037 | 1.171 | \$17,106      | \$11,150 | 0.984 | 1.173 | \$11,330      |
| Sub population: eGFR <45           | \$6,565  | 0.856 | 1.109 | \$7,670       | \$17,534 | 1.044 | 1.178 | \$16,801      | \$11,110 | 0.993 | 1.183 | \$11,193      |
| Sub population: eGFR ≥45           | \$7,158  | 0.775 | 1.007 | \$9,234       | \$17,739 | 0.939 | 1.063 | \$18,897      | \$11,246 | 0.903 | 1.08  | \$12,450      |
| Sub population: Age <65            | \$6,735  | 0.837 | 1.085 | \$8,041       | \$17,903 | 1.032 | 1.167 | \$17,340      | \$11,237 | 0.979 | 1.168 | \$11,473      |
| Sub population: Age ≥65            | \$4,706  | 0.624 | 0.806 | \$7,535       | \$11,029 | 0.702 | 0.789 | \$15,705      | \$9,475  | 0.837 | 0.998 | \$11,323      |
| Health state costs (80% of mean)   | \$6,538  | 0.824 | 1.068 | \$7,934       | \$15,610 | 1.003 | 1.134 | \$15,567      | \$9,822  | 0.957 | 1.143 | \$10,263      |
| Health state costs (120% of mean)  | \$7,107  | 0.824 | 1.068 | \$8,626       | \$19,732 | 1.003 | 1.134 | \$19,678      | \$12,549 | 0.957 | 1.143 | \$13,110      |
| Event costs (80% of mean)          | \$6,849  | 0.824 | 1.068 | \$8,312       | \$17,695 | 1.003 | 1.134 | \$17,647      | \$11,201 | 0.957 | 1.143 | \$11,702      |
| Event costs (120% of mean)         | \$6,795  | 0.824 | 1.068 | \$8,248       | \$17,647 | 1.003 | 1.134 | \$17,599      | \$11,172 | 0.957 | 1.143 | \$11,671      |
| Adverse event costs (80% of mean)  | \$6,783  | 0.824 | 1.068 | \$8,232       | \$17,576 | 1.003 | 1.134 | \$17,528      | \$11,067 | 0.957 | 1.143 | \$11,562      |
| Adverse event costs (120% of mean) | \$6,861  | 0.824 | 1.068 | \$8,327       | \$17,766 | 1.003 | 1.134 | \$17,717      | \$11,304 | 0.957 | 1.143 | \$11,811      |
| Intervention costs (80% of mean)   | \$5,846  | 0.824 | 1.068 | \$7,096       | \$16,315 | 1.003 | 1.134 | \$16,271      | \$10,466 | 0.957 | 1.143 | \$10,935      |
| Intervention costs (120% of mean)  | \$7,798  | 0.824 | 1.068 | \$9,465       | \$19,026 | 1.003 | 1.134 | \$18,974      | \$11,905 | 0.957 | 1.143 | \$12,439      |
| Comparator costs (80% of mean)     | \$6,807  | 0.824 | 1.068 | \$8,263       | \$17,662 | 1.003 | 1.134 | \$17,614      | \$11,173 | 0.957 | 1.143 | \$11,673      |
| Comparator costs (120% of mean)    | \$6,836  | 0.824 | 1.068 | \$8,297       | \$17,679 | 1.003 | 1.134 | \$17,631      | \$11,199 | 0.957 | 1.143 | \$11,699      |

|                                         |          |       |       |          |          |       |       |          |          |       |       |          |
|-----------------------------------------|----------|-------|-------|----------|----------|-------|-------|----------|----------|-------|-------|----------|
| Health state utility (80% of mean)      | \$6,823  | 0.659 | 1.068 | \$10,352 | \$17,671 | 0.802 | 1.134 | \$22,032 | \$11,186 | 0.766 | 1.143 | \$14,611 |
| Health state utility (120% of mean)     | \$6,823  | 0.989 | 1.068 | \$6,900  | \$17,671 | 1.137 | 1.134 | \$15,546 | \$11,186 | 1.145 | 1.143 | \$9,772  |
| Event disutility (80% of mean)          | \$6,823  | 0.824 | 1.068 | \$8,281  | \$17,671 | 1.003 | 1.134 | \$17,623 | \$11,186 | 0.957 | 1.143 | \$11,686 |
| Event disutility (120% of mean)         | \$6,823  | 0.824 | 1.068 | \$8,279  | \$17,671 | 1.003 | 1.134 | \$17,622 | \$11,186 | 0.957 | 1.143 | \$11,686 |
| Adverse event disutility (80% of mean)  | \$6,823  | 0.824 | 1.068 | \$8,279  | \$17,671 | 1.003 | 1.134 | \$17,620 | \$11,186 | 0.957 | 1.143 | \$11,685 |
| Adverse event disutility (120% of mean) | \$6,823  | 0.824 | 1.068 | \$8,282  | \$17,671 | 1.003 | 1.134 | \$17,625 | \$11,186 | 0.957 | 1.143 | \$11,689 |
| Discontinuation (0.00%)                 | \$14,061 | 1.391 | 1.814 | \$10,106 | \$34,543 | 1.706 | 1.938 | \$20,251 | \$22,449 | 1.634 | 1.96  | \$13,742 |
| Discontinuation (10.00%)                | \$4,667  | 0.63  | 0.815 | \$7,407  | \$12,443 | 0.764 | 0.861 | \$16,297 | \$7,766  | 0.728 | 0.867 | \$10,659 |

## SUPPLEMENTAL FIGURES

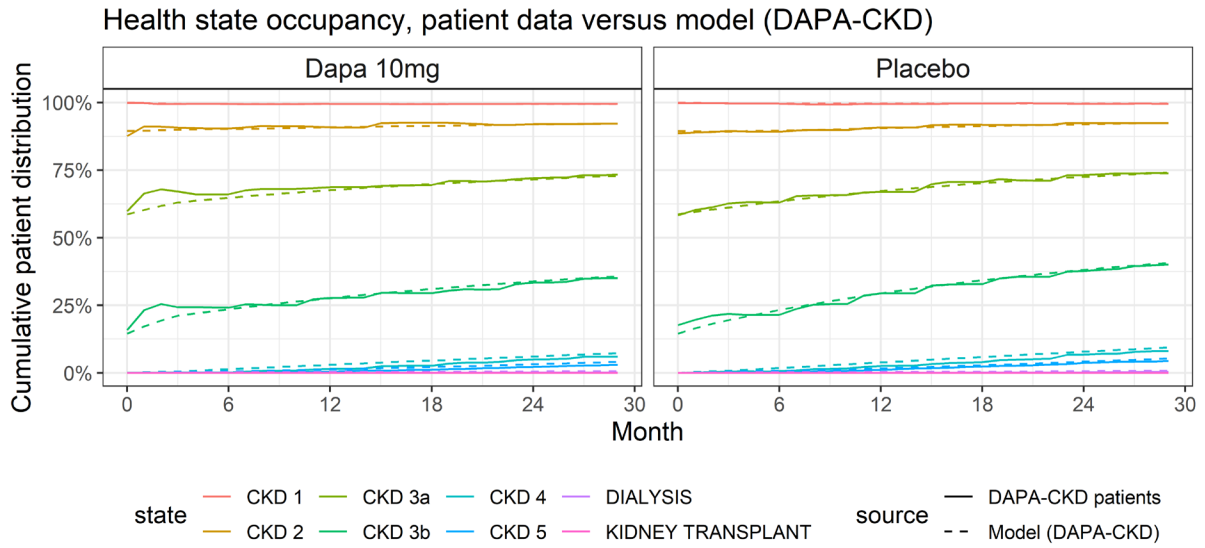

*Supplemental Figure 1. Stacked area plot of predicted (dashed line) and observed (solid line) patient distribution in CKD stages in the model and DAPA-CKD trial, respectively. The proportional occupancy in each CKD stage-defined health state is designated by the distance between each line for both predicted and observed cases.*

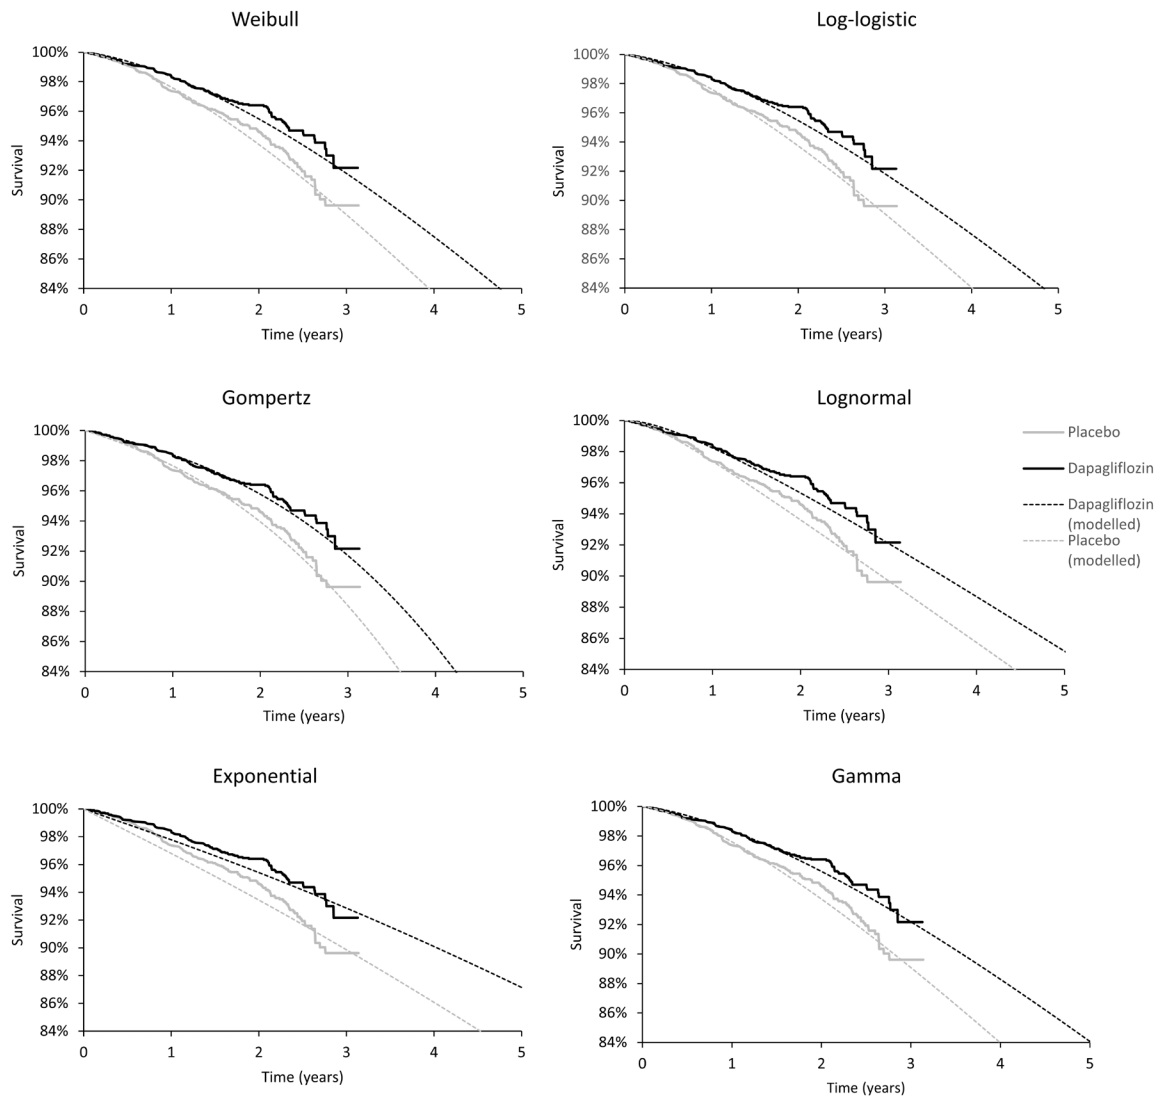

*Supplemental Figure 2. Observed (solid line) and predicted (dotted line) incidence of all-cause mortality.*

*The solid line plots observed data from the DAPA-CKD trial, and the dotted lines represent the parametric functions that have been fitted to the data in each Kaplan-Meier graph.*

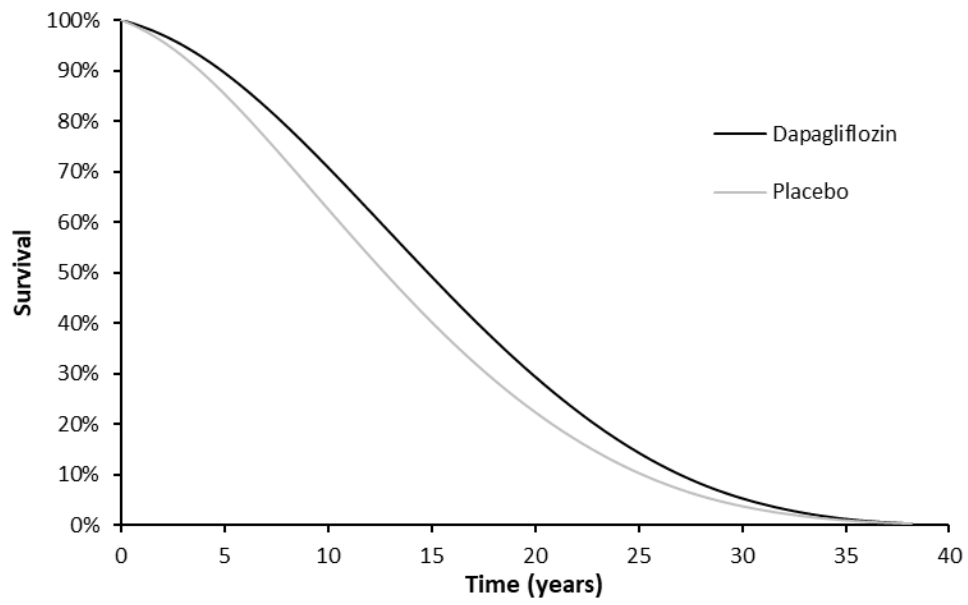

*Supplemental Figure 3. Extrapolated mortality rate of patients treated with dapagliflozin and standard therapy versus placebo and standard therapy over a lifetime horizon using a Gompertz survival equation*

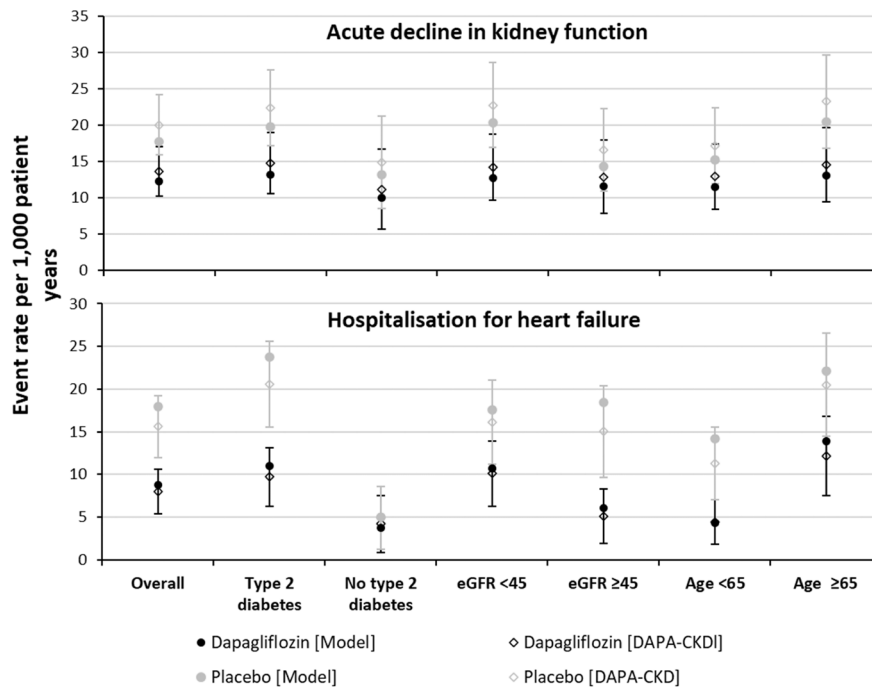

Supplemental Figure 4. Observed (rhombuses) and predicted (circles) incidence of acute decline in kidney function and hospitalisation for heart failure across subgroups. Unadjusted model projections were calculated using generalised estimating equations and were compared to observed case data. eGFR: estimated glomerular filtration rate

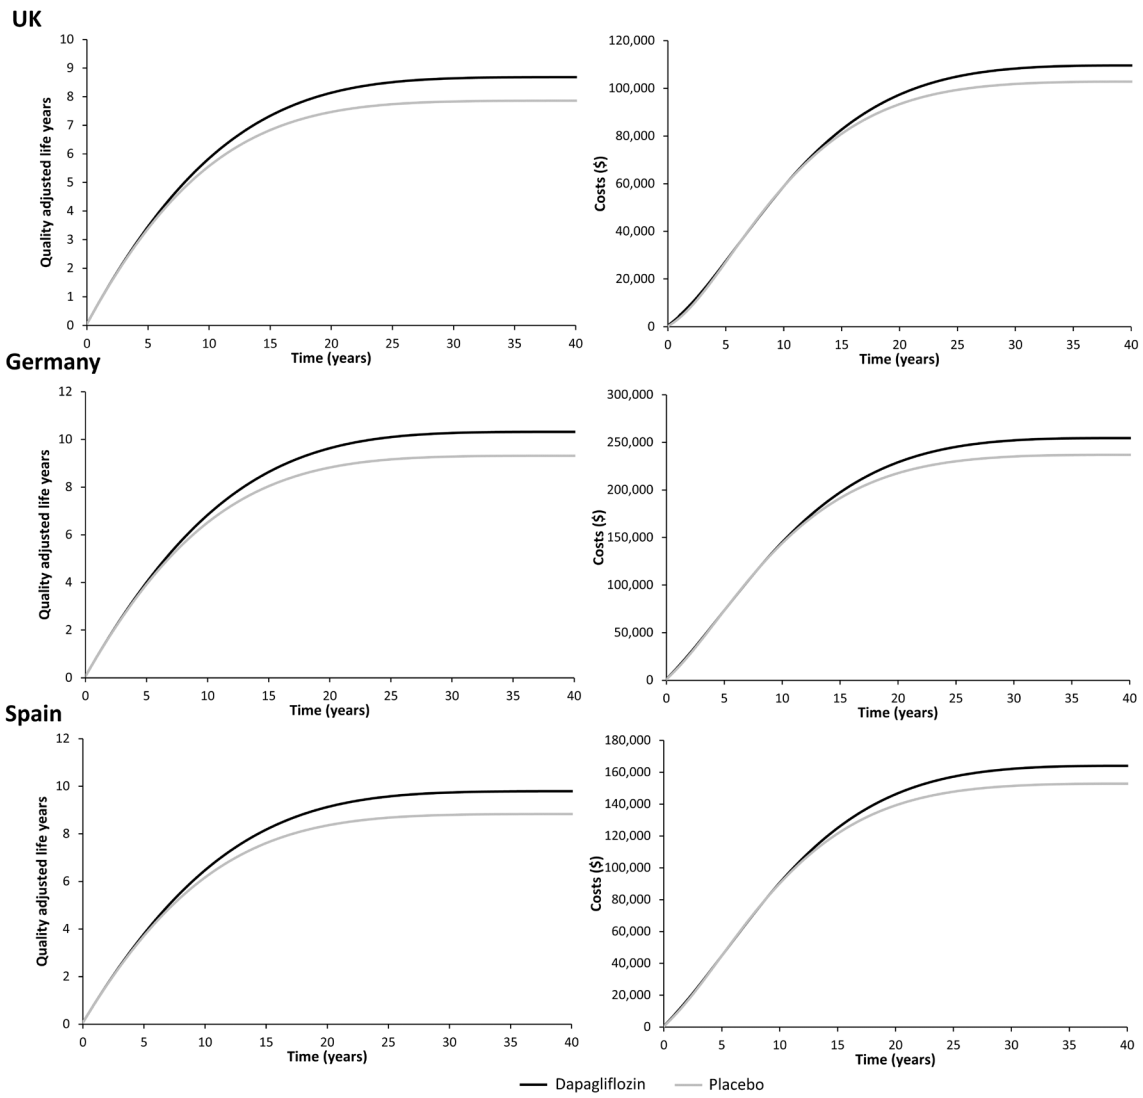

Supplemental Figure 5. Cumulative accrual of QALYs and total costs (left to right) in patients treated with dapagliflozin and standard therapy (blue) and standard therapy only (grey) in UK, Germany and Spain setting (top to bottom). QALY: quality-adjusted life year
